# Supplementary material for: Opportunities for Quality Improvement Programs (QIPs) in the Nutrition Support of Patients with Cancer
Source: Healthcare (Basel). 2020 Jul 24;8(3):227. doi: 10.3390/healthcare8030227 (PMC7551760; doi:10.3390/healthcare8030227)
Supplement: Supplementary file 1 [file healthcare-08-00227-s001.xlsx]

## Sheet: Cancer by Treatment Type
Table S1. National Comprehensive Cancer Network (NCCN) Guidelines for Treatment of Cancer by Site
NCCN GUIDELINES FOR TREATMENT OF CANCER BY SITE	Number of Instances of 'Nutrition'	Nutrition Evaluation	Nutrition Assessment	Nutrition Status	Nutrition Support	Nutrition Intervention	Nutrition Counseling	Oral Nutrition	Entire Section Devoted to Nutrition
Acute Lymphoblastic Leukemia (Adult and AYA)	3	No	No	No	Yes	No	No	No	No
Acute Myeloid Leukemia	1	No	No	Yes	No	No	No	No	No
AIDS-Related Kaposi Sarcoma	0	No	No	No	No	No	No	No	No
Anal Carcinoma	3	No	No	No	No	Yes	No	No	No
Bladder Cancer	0	No	No	No	No	No	No	No	No
Bone Cancer	0	No	No	No	No	No	No	No	No
Breast Cancer	3	No	No	No	No	No	No	No	No
Central Nervous System Cancers	2	No	No	No	Yes	No	No	No	No
Cervical Cancer	2	No	No	No	No	No	Yes	No	No
Chronic Lymphocytic Leukemia/Small Lymphocytic Lymphoma	0	No	No	No	No	No	No	No	No
Chronic Myeloid Leukemia	6	No	No	No	No	No	No	No	No
Colon Cancer	11	No	No	No	No	Yes	No	No	No
Esophageal and Esophagogastric Junction Cancers	50	No	Yes	Yes	Yes	No	Yes	Yes	No
Gastric Cancer	29	No	Yes	Yes	Yes	No	Yes	No	No
Gestational Trophoblastic Neoplasia	1	No	No	No	No	No	No	No	No
Hairy Cell Leukemia	0	No	No	No	No	No	No	No	No
Head and Neck Cancers	74	Yes	Yes	Yes	Yes	Yes	Yes	Yes	Yes
Hepatobiliary Cancers	0	No	No	No	No	No	No	No	No
Hodgkin Lymphoma	0	No	No	No	No	No	No	No	No
Kidney Cancer	0	No	No	No	No	No	No	No	No
Malignant Pleural Mesothelioma	0	No	No	No	No	No	No	No	No
Cutaneous Melanoma	0	No	No	No	No	No	No	No	No
Uveal Melanoma	0	No	No	No	No	No	No	No	No
Multiple Myeloma	0	No	No	No	No	No	No	No	No
Systemic Light Chain Amyloidosis	0	No	No	No	No	No	No	No	No
Waldenström's Macroglobulinemia / Lymphoplasmacytic Lymphoma	0	No	No	No	No	No	No	No	No
Myelodysplastic Syndromes	4	No	No	No	No	No	No	No	No
Myeloproliferative Neoplasms	3	No	No	Yes	No	No	No	No	No
Neuroendocrine and Adrenal Tumors	1	No	No	No	No	No	No	No	No
B-Cell Lymphomas	0	No	No	No	No	No	No	No	No
Pediatric Aggressive Mature B-Cell Lymphomas	1	No	No	No	No	No	No	No	No
Primary Cutaneous Lymphomas	0	No	No	No	No	No	No	No	No
T-Cell Lymphomas	0	No	No	No	No	No	No	No	No
Basal Cell Skin Cancer	0	No	No	No	No	No	No	No	No
Dermatofibrosarcoma Protuberans	0	No	No	No	No	No	No	No	No
Merkel Cell Carcinoma	0	No	No	No	No	No	No	No	No
Squamous Cell Skin Cancer	0	No	No	No	No	No	No	No	No
Non-Small Cell Lung Cancer	2	No	No	No	No	No	No	No	No
Occult Primary	0	No	No	No	No	No	No	No	No
Ovarian Cancer	1	No	No	Yes	No	No	No	No	No
Pancreatic Adenocarcinoma	17	Yes	No	Yes	No	No	No	No	No
Penile Cancer	0	No	No	No	No	No	No	No	No
Prostate Cancer	2	No	No	No	No	No	No	No	No
Rectal Cancer	12	No	No	No	No	Yes	No	No	No
Small Bowel Adenocarcinoma	0	No	No	No	No	No	No	No	No
Small Cell Lung Cancer	0	No	No	No	No	No	No	No	No
Soft Tissue Sarcoma	0	No	No	No	No	No	No	No	No
Systemic Mastocytosis	1	No	No	Yes	No	No	No	No	No
Testicular Cancer	0	No	No	No	No	No	No	No	No
Thymomas and Thymic Carcinomas	0	No	No	No	No	No	No	No	No
Thyroid Carcinoma	2	No	No	No	No	No	No	No	No
Uterine Neoplasms	8	No	No	No	No	No	Yes	No	No
Vulvar Cancer	2	No	No	No	No	No	Yes	No	No
Table S2. National Comprehensive Cancer Network (NCCN) Guidelines for Treatment of Cancer by Specific Population
NCCN GUIDELINES FOR TREATMENT OF CANCER BY SPECIFIC POPULATION	Number of Instances of 'Nutrition'	Nutrition Evaluation	Nutrition Assessment	Nutrition Status	Nutrition Support	Nutrition Intervention	Nutrition Counseling	Oral Nutrition	Entire Section Devoted to Nutrition
People Living with HIV	4	No	No	Yes	Yes	No	No	No	No
Older Adult Oncology	67	No	Yes	Yes	Yes	No	No	No	Yes

## Sheet: Supportive Care
Table S3. National Comprehensive Cancer Network (NCCN) Guidelines for Supportive Care
NCCN GUIDELINES FOR SUPPORTIVE CARE	Number of Instances of 'Nutrition'	Nutrition Evaluation	Nutrition Assessment	Nutrition Status	Nutrition Support	Nutrition Intervention	Nutrition Counseling	Oral Nutrition	Entire Sections Devoted to Nutrition
Adult Cancer Pain	0	No	No	No	No	No	No	No	No
Antiemesis	1	No	No	No	No	No	No	No	No
Cancer-Associated Venous Thromboembolic Disease	0	No	No	No	No	No	No	No	No
Cancer-Related Fatigue	29	No	Yes	No	No	No	Yes	No	Yes
Distress Management	3	No	No	Yes	No	No	No	No	No
Hematopoietic Cell Transplantation	2	Yes	No	No	No	No	No	No	No
Hematopoietic Growth Factors	8	No	No	No	No	No	No	No	No
Management of Immunotherapy-Related Toxicities	0	No	No	No	No	No	No	No	No
Palliative Care	31	No	No	No	Yes	Yes	No	No	No
Prevention and Treatment of Cancer-Related Infections	5	No	No	No	No	No	No	No	No
Smoking Cessation	7	No	No	No	No	No	No	No	No
Survivorship	73	No	No	Yes	No	No	No	No	Yes

## Sheet: Patients
Table S4. National Comprehensive Cancer Network (NCCN) Guidelines for Patients
NCCN GUIDELINES FOR PATIENTS	Number of Instances of 'Nutrition'	Nutrition Evaluation	Nutrition Assessment	Nutrition Status	Nutrition Support	Nutrition Intervention	Nutrition Counseling	Oral Nutrition	Entire Sections Devoted to Nutrition
Acute Lymphoblastic Leukemia	0	No	No	No	No	No	No	No	No
Acute Myeloid Leukemia	0	No	No	No	No	No	No	No	No
Bladder Cancer	0	No	No	No	No	No	No	No	No
Brain Cancer/Gliomas	0	No	No	No	No	No	No	No	No
Noninvasive Breast Cancer	0	No	No	No	No	No	No	No	No
Invasive Breast Cancer	0	No	No	No	No	No	No	No	No
Metastatic Breast Cancer	0	No	No	No	No	No	No	No	No
Chronic Lymphocytic Leukemia	0	No	No	No	No	No	No	No	No
Chronic Myeloid Leukemia	0	No	No	No	No	No	No	No	No
Colon Cancer	0	No	No	No	No	No	No	No	No
Diffuse Large B-Cell Lymphoma	0	No	No	No	No	No	No	No	No
Esophageal Cancer	17	No	No	No	No	No	No	No	Yes
Follicular Lymphoma	0	No	No	No	No	No	No	No	No
Hepatobiliary Cancers	1	No	No	No	No	No	No	No	No
Hodgkin Lymphoma	0	No	No	No	No	No	No	No	No
Kidney Cancer	3	No	No	No	No	No	No	No	No
Early and Locally Advanced Lung Cancer	0	No	No	No	No	No	No	No	No
Metastatic Lung Cancer	0	No	No	No	No	No	No	No	No
Malignant Pleural Mesothelioma	0	No	No	No	No	No	No	No	No
Mantle Cell Lymphoma	0	No	No	No	No	No	No	No	No
Melanoma	0	No	No	No	No	No	No	No	No
Multiple Myeloma	0	No	No	No	No	No	No	No	No
Mycosis Fungoides	0	No	No	No	No	No	No	No	No
Myelodysplastic Syndromes	0	No	No	No	No	No	No	No	No
Myeloproliferative Neoplasms	0	No	No	No	No	No	No	No	No
Nasopharyngeal Cancer	5	No	Yes	No	No	No	No	No	Yes
Neuroendocrine Tumors	2	No	No	No	No	No	No	No	No
Oral Cancers	7	No	Yes	No	No	No	No	No	Yes
Ovarian Cancer	2	No	No	Yes	No	No	No	No	No
Pancreatic Cancer	5	No	No	No	No	No	No	No	No
Peripheral T-Cell Lymphoma	0	No	No	No	No	No	No	No	No
Prostate Cancer	0	No	No	No	No	No	No	No	No
Rectal Cancer	0	No	No	No	No	No	No	No	No
Soft Tissue Sarcoma	2	No	No	No	No	No	No	No	No
Squamous Cell Skin Cancer	0	No	No	No	No	No	No	No	No
Stomach Cancer	13	No	Yes	No	No	No	No	No	Yes
Thyroid Cancer	0	No	No	No	No	No	No	No	No
Uterine Cancer	1	No	No	No	No	No	No	No	No
Waldenström's Macroglobulinemia	0	No	No	No	No	No	No	No	No

## Sheet: Sheet3
Yes
No
